# Supplementary material for: Correlation between electroconductive and structural properties of proton conductive acceptor-doped barium zirconate
Source: Royal Society of Chemistry journal article supplement (doi:10.1039/c4ta05701e), 2014-11-19
Supplement: c4ta05701e1.pdf [file c4ta05701e1.pdf]

Electronic Supplementary Information

**Correlation between Electroconductive and Structural Properties of Proton Conductive Acceptor-Doped Barium Zirconate**

Donglin Han <sup>a\*</sup>, Kozo Shinoda <sup>b</sup>, Shigeo Sato <sup>c</sup>, Masatoshi Majima <sup>d</sup>, Tetsuya Uda <sup>a\*</sup>

<sup>a</sup> Department of Materials Science and Engineering, Kyoto University,  
Yoshida Honmachi, Sakyo-ku, Kyoto 606-8501, Japan

<sup>b</sup> Institute of Multidisciplinary Research for Advanced Materials, Tohoku University,  
Katahira 2-1-1, Aoba-ku, Sendai 980-8577, Japan

<sup>c</sup> Graduate School of Science and Engineering, Ibaraki University  
4-12-1 Nakanarusawa, Hitachi 316-8511, Japan

<sup>d</sup> Sumitomo Electric Industries, Ltd.,  
1-1-1, Koyakita, Itami-shi, Hyogo 664-0016, Japan

\* Corresponding author: Donglin Han (han.donglin.8n@kyoto-u.ac.jp)  
and Tetsuya Uda (materials\_process@aqua.mtl.kyoto-u.ac.jp)  
TEL: +81-75-753-5445, FAX: +81-75-753-5284

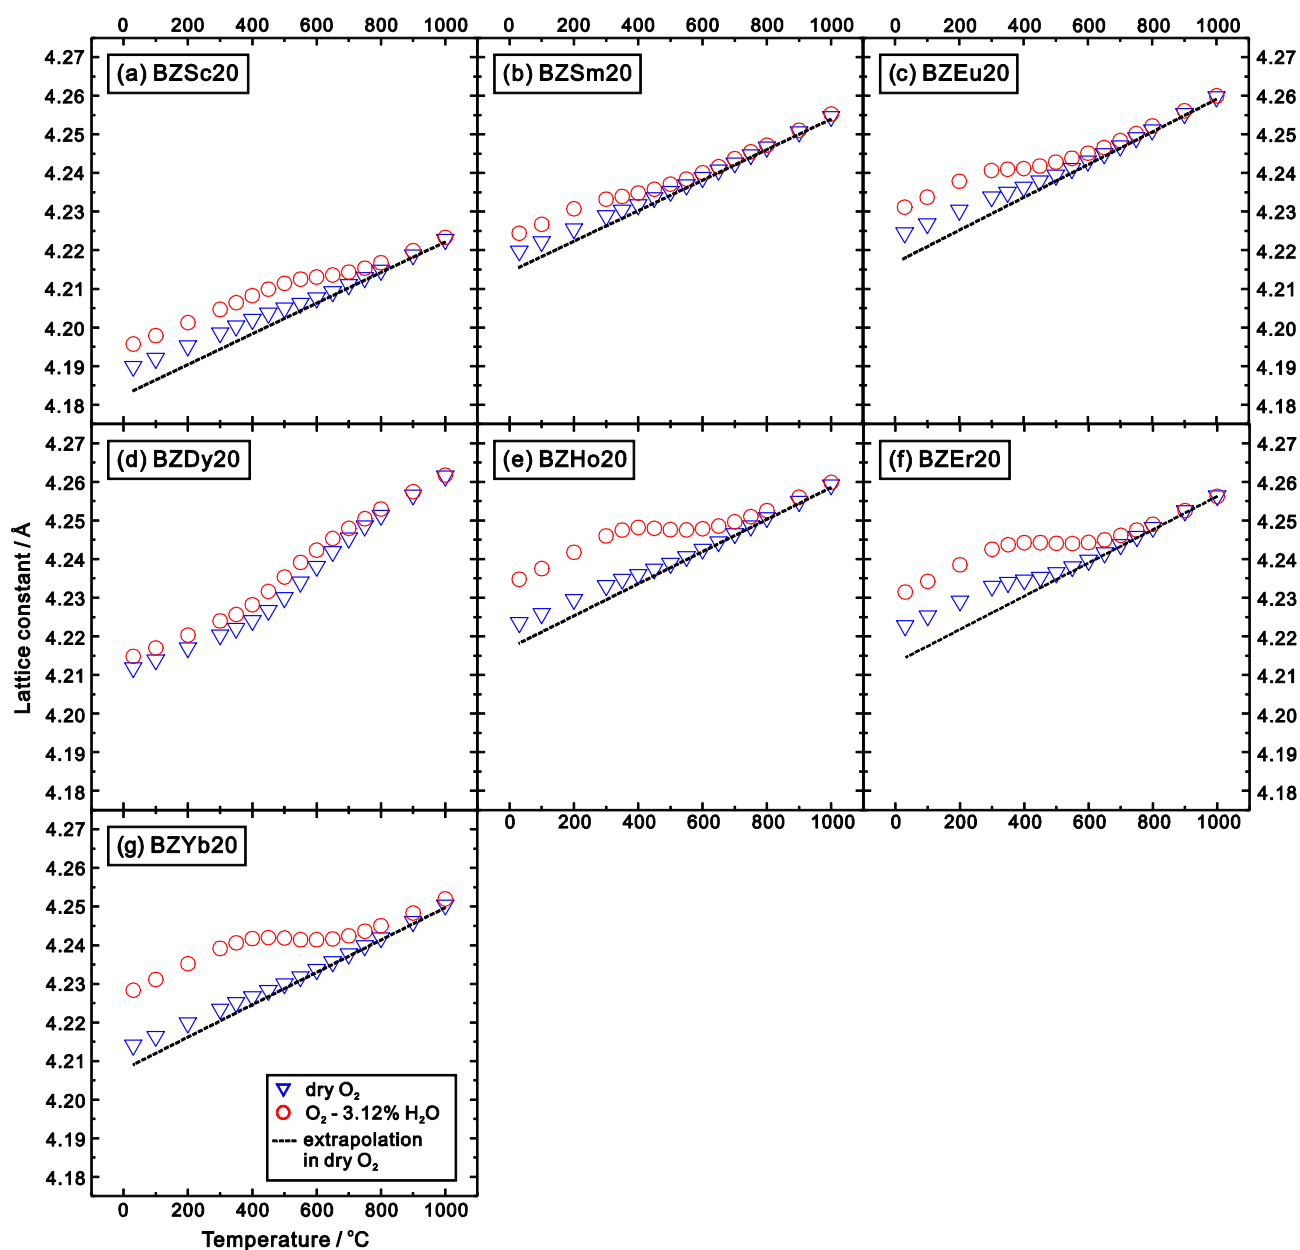

**Fig. S1** Variation of lattice constants of (a)  $\text{BaZr}_{0.8}\text{Sc}_{0.2}\text{O}_{3-\delta}$  (BZSc20), (b)  $\text{BaZr}_{0.8}\text{Sm}_{0.2}\text{O}_{3-\delta}$  (BZSm20), (c)  $\text{BaZr}_{0.8}\text{Eu}_{0.2}\text{O}_{3-\delta}$  (BZEu20), (d)  $\text{BaZr}_{0.8}\text{Dy}_{0.2}\text{O}_{3-\delta}$  (BZDy20), (e)  $\text{BaZr}_{0.8}\text{Ho}_{0.2}\text{O}_{3-\delta}$  (BZHo20), (f)  $\text{BaZr}_{0.8}\text{Er}_{0.2}\text{O}_{3-\delta}$  (BZEr20), and (g)  $\text{BaZr}_{0.8}\text{Yb}_{0.2}\text{O}_{3-\delta}$  (BZYb20) in dry  $\text{O}_2$  and wet  $\text{O}_2$  ( $p_{\text{H}_2\text{O}} = 0.0312 \text{ atm}$ ) with temperature. All the samples were finally heat-treatment at  $1600^\circ\text{C}$  in  $\text{O}_2$  for 24 h for sintering. The dashed line indicates the extrapolation using the data obtained in the temperature range of 700 to  $1000^\circ\text{C}$  in dry  $\text{O}_2$ . The profile of BZSc20, BZSm20, BZEu20 and BZDy20 were cited from our previous work (D. Han, *et al.*, *J. Am. Ceram. Soc.*, 2014, **97**, 643.).

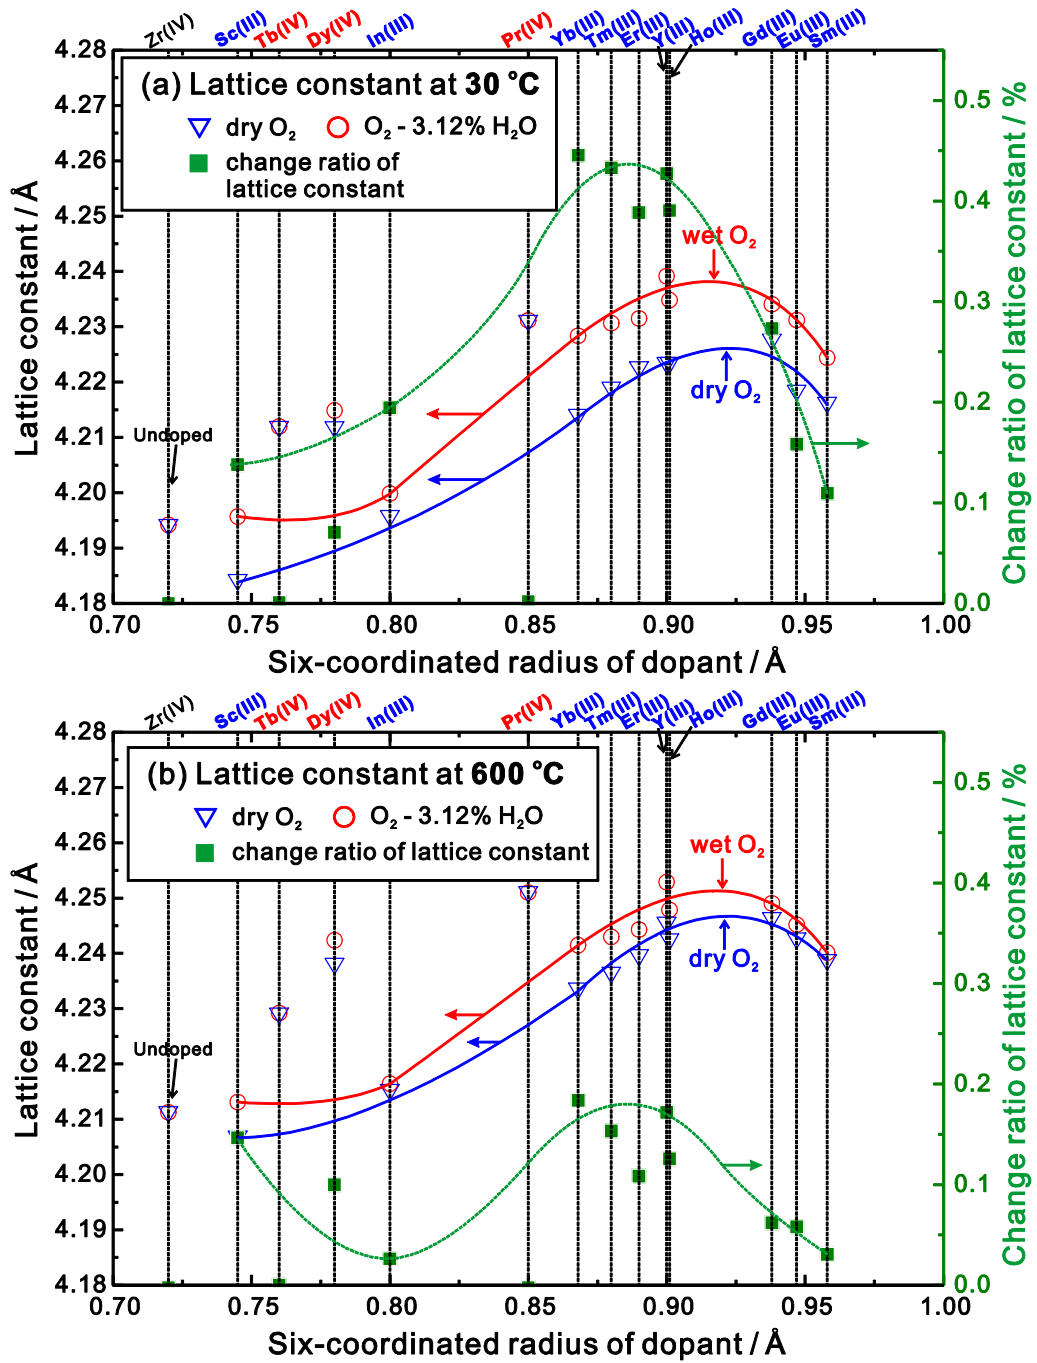

**Fig. S2** Lattice constant of the samples of undoped BaZrO<sub>3</sub> and those doped with rare earth elements and In at (a) 30 °C, and (b) 600 °C, determined from HT-XRD measurements. The lattice constants in dry and wet O<sub>2</sub> ( $p_{\text{H}_2\text{O}} = 0.0312 \text{ atm}$ ) atmospheres were marked using open triangle and circle, respectively. Change ratio of the lattice constant was marked using solid square symbols. All the samples were sintered at 1600 °C in O<sub>2</sub> for 24 h before the HT-XRD measurements. Solid and dash lines are used to highlight the tendency of variation with the increasing dopant radius for the lattice constants of the samples doped with trivalent cations (Sc, In, Yb, Tm, Er, Y, Ho, Gd, Eu and Sm) and their change ratio.

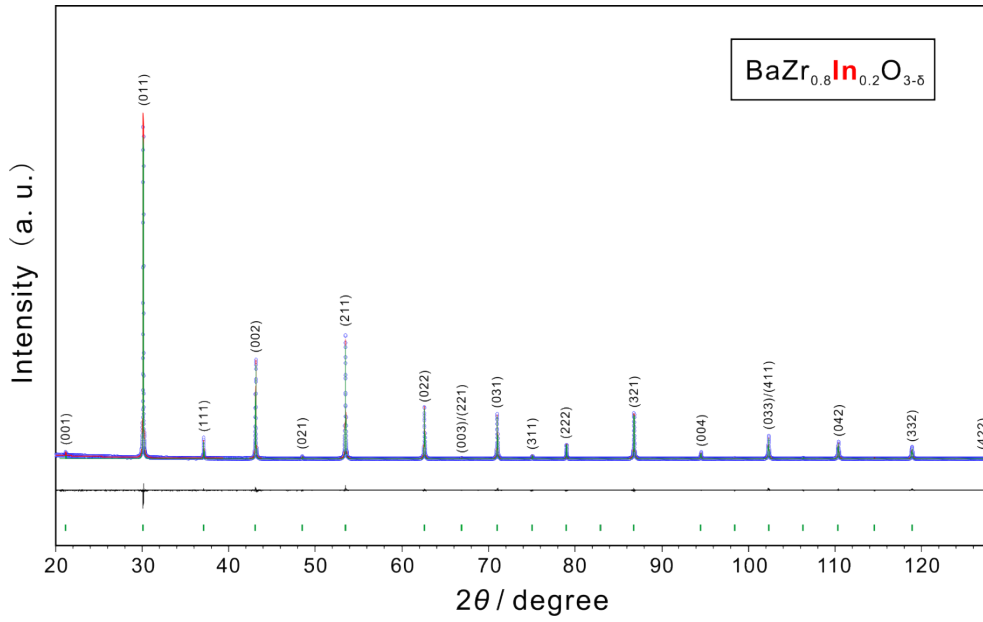

**Fig. S3** Rietveld refinement of the diffraction pattern of  $\text{BaZr}_{0.8}\text{In}_{0.2}\text{O}_{3-\delta}$  collected with  $\text{Cu } K\alpha_1$  monochromatic X-ray. The sample was quenched to room temperature after the heat-treatment at 1600 °C. Two cubic perovskite ( $Pm\bar{3}m$ ) structure models for hydrated and dehydrated phases were adopted for the refinement. Observed profile (blue circle), calculated profile (red line), difference (black line at bottom), and Bragg peaks of candidate phases (vertical lines) are shown.

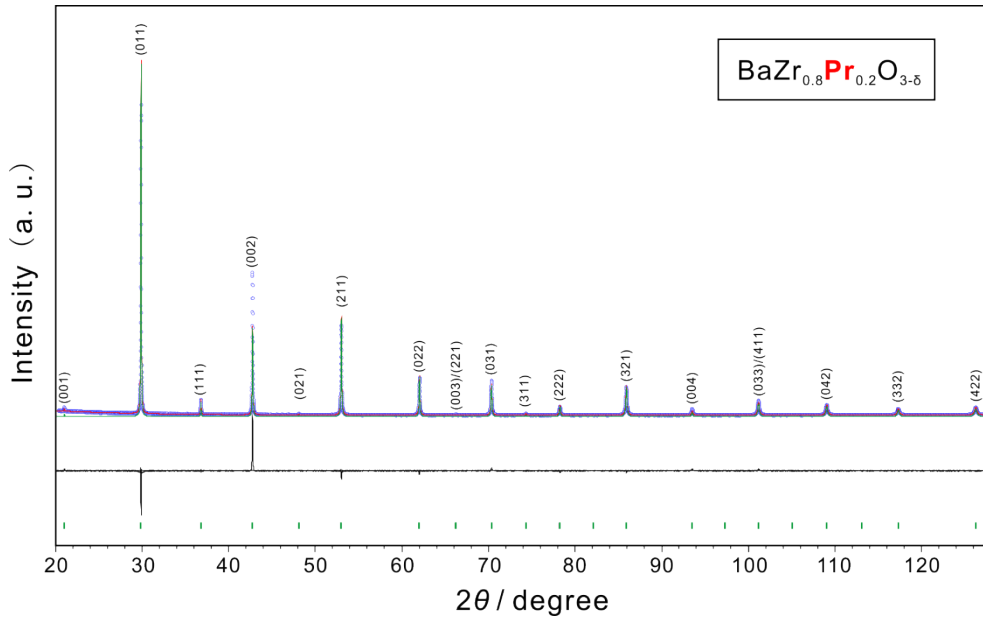

**Fig. S4** Rietveld refinement of the diffraction pattern of  $\text{BaZr}_{0.8}\text{Pr}_{0.2}\text{O}_{3-\delta}$  collected with  $\text{Cu } K\alpha_1$  monochromatic X-ray. The sample was quenched to room temperature after the heat-treatment at 1600 °C. One cubic perovskite ( $Pm\bar{3}m$ ) structure model was adopted for the refinement. Observed profile (blue circle), calculated profile (red line), difference (black line at bottom), and Bragg peaks of candidate phases (vertical lines) are shown.

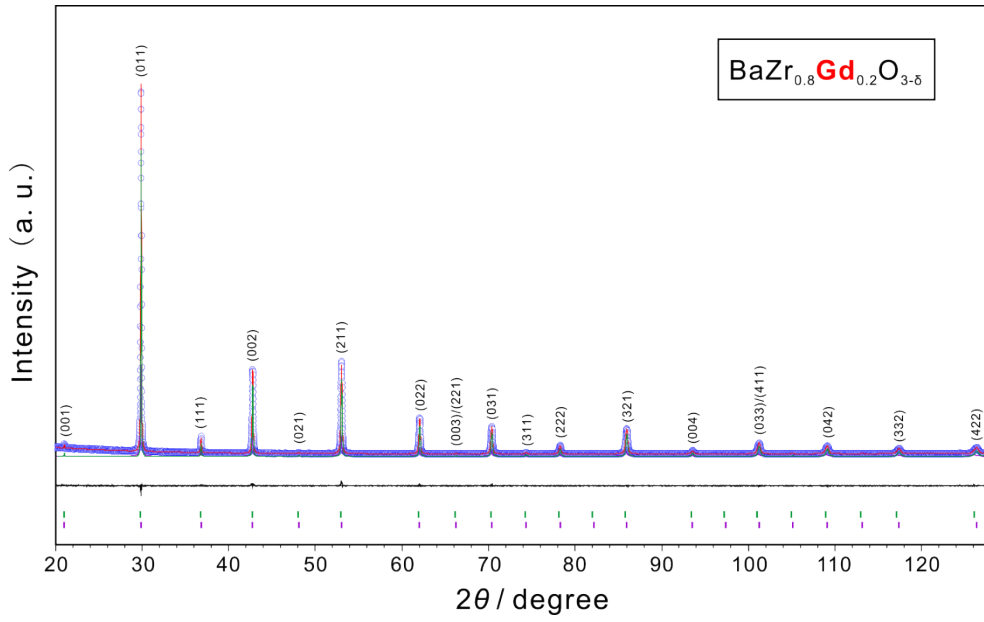

**Fig. S5** Rietveld refinement of the diffraction pattern of  $\text{BaZr}_{0.8}\text{Gd}_{0.2}\text{O}_{3-\delta}$  collected with  $\text{Cu } K\alpha_1$  monochromatic X-ray. The sample was quenched to room temperature after the heat-treatment at 1600 °C. Two cubic perovskite ( $Pm\bar{3}m$ ) structure models for hydrated and dehydrated phases were adopted for the refinement. Observed profile (blue circle), calculated profile (red line), difference (black line at bottom), and Bragg peaks of candidate phases (vertical lines) are shown.

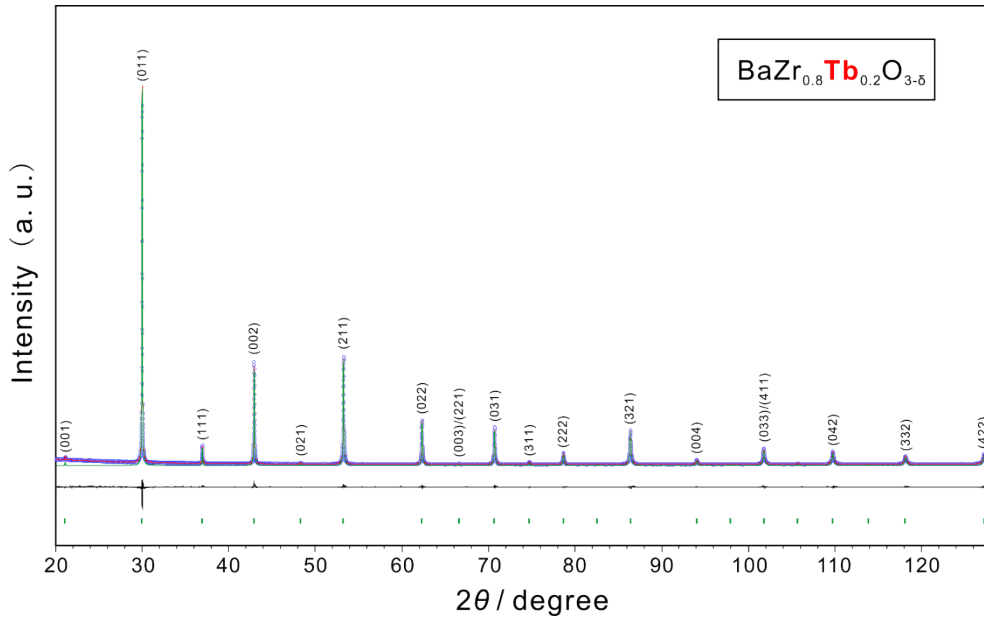

**Fig. S6** Rietveld refinement of the diffraction pattern of  $\text{BaZr}_{0.8}\text{Tb}_{0.2}\text{O}_{3-\delta}$  collected with  $\text{Cu } K\alpha_1$  monochromatic X-ray. The sample was quenched to room temperature after the heat-treatment at 1600 °C. One cubic perovskite ( $Pm\bar{3}m$ ) structure model was adopted for the refinement. Observed profile (blue circle), calculated profile (red line), difference (black line at bottom), and Bragg peaks of candidate phases (vertical lines) are shown.

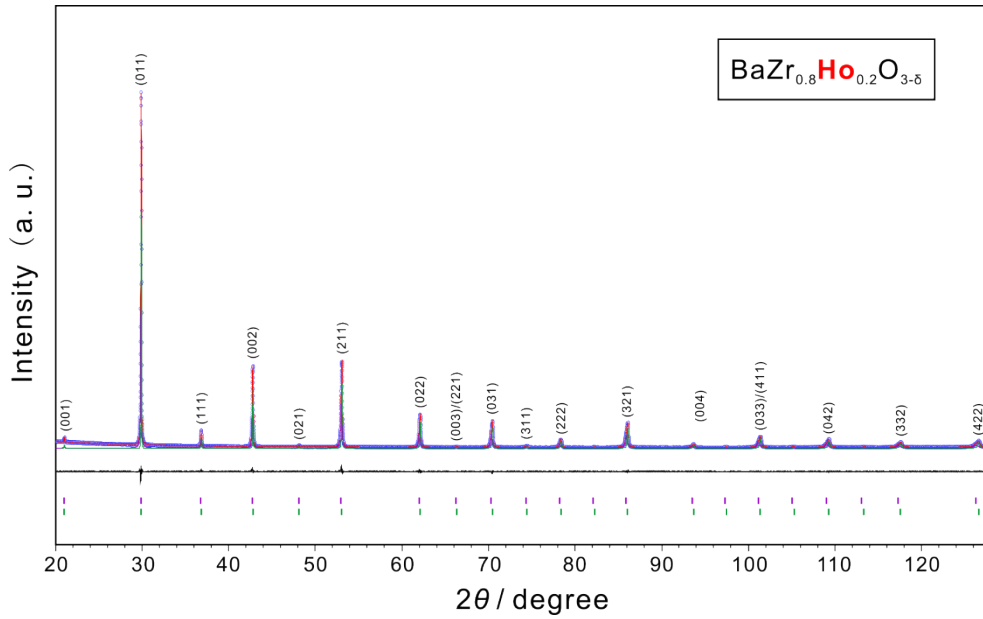

**Fig. S7** Rietveld refinement of the diffraction pattern of  $\text{BaZr}_{0.8}\text{Ho}_{0.2}\text{O}_{3-\delta}$  collected with  $\text{Cu } K\alpha_1$  monochromatic X-ray. The sample was quenched to room temperature after the heat-treatment at 1600 °C. Two cubic perovskite ( $Pm\bar{3}m$ ) structure models for hydrated and dehydrated phases were adopted for the refinement. Observed profile (blue circle), calculated profile (red line), difference (black line at bottom), and Bragg peaks of candidate phases (vertical lines) are shown.

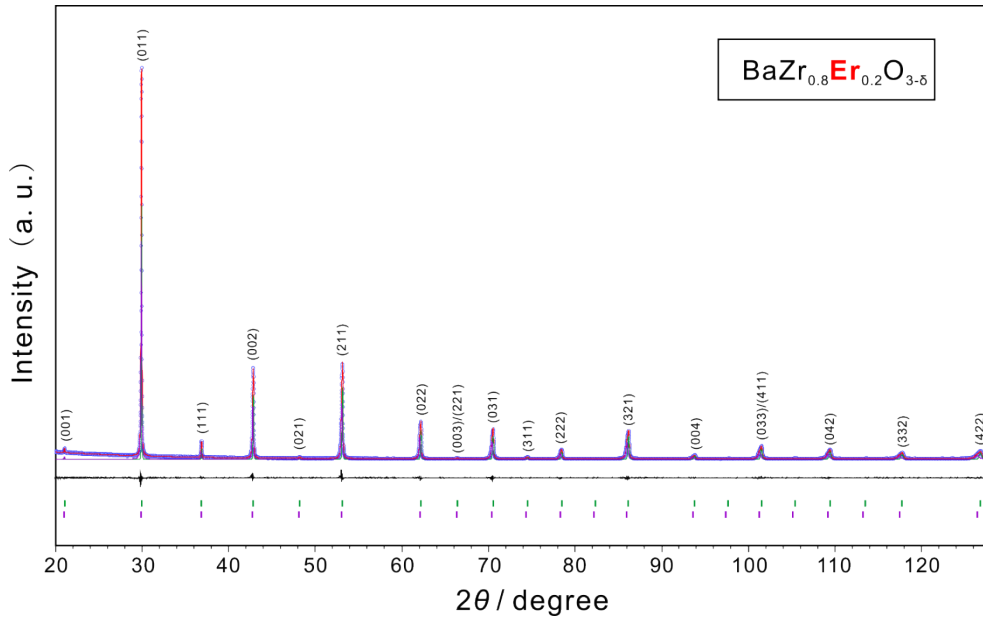

**Fig. S8** Rietveld refinement of the diffraction pattern of  $\text{BaZr}_{0.8}\text{Er}_{0.2}\text{O}_{3-\delta}$  collected with  $\text{Cu } K\alpha_1$  monochromatic X-ray. The sample was quenched to room temperature after the heat-treatment at 1600 °C. Two cubic perovskite ( $Pm\bar{3}m$ ) structure models for hydrated and dehydrated phases were adopted for the refinement. Observed profile (blue circle), calculated profile (red line), difference (black line at bottom), and Bragg peaks of candidate phases (vertical lines) are shown.

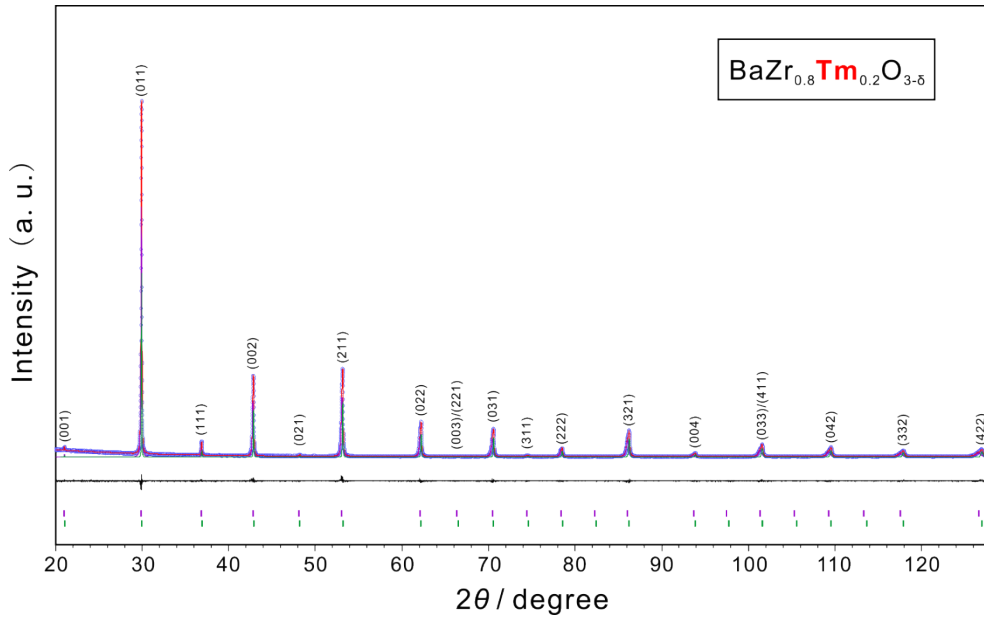

**Fig. S9** Rietveld refinement of the diffraction pattern of  $\text{BaZr}_{0.8}\text{Tm}_{0.2}\text{O}_{3-\delta}$  collected with  $\text{Cu } K\alpha_1$  monochromatic X-ray. The sample was quenched to room temperature after the heat-treatment at 1600 °C. Two cubic perovskite ( $Pm\bar{3}m$ ) structure models for hydrated and dehydrated phases were adopted for the refinement. Observed profile (blue circle), calculated profile (red line), difference (black line at bottom), and Bragg peaks of candidate phases (vertical lines) are shown.

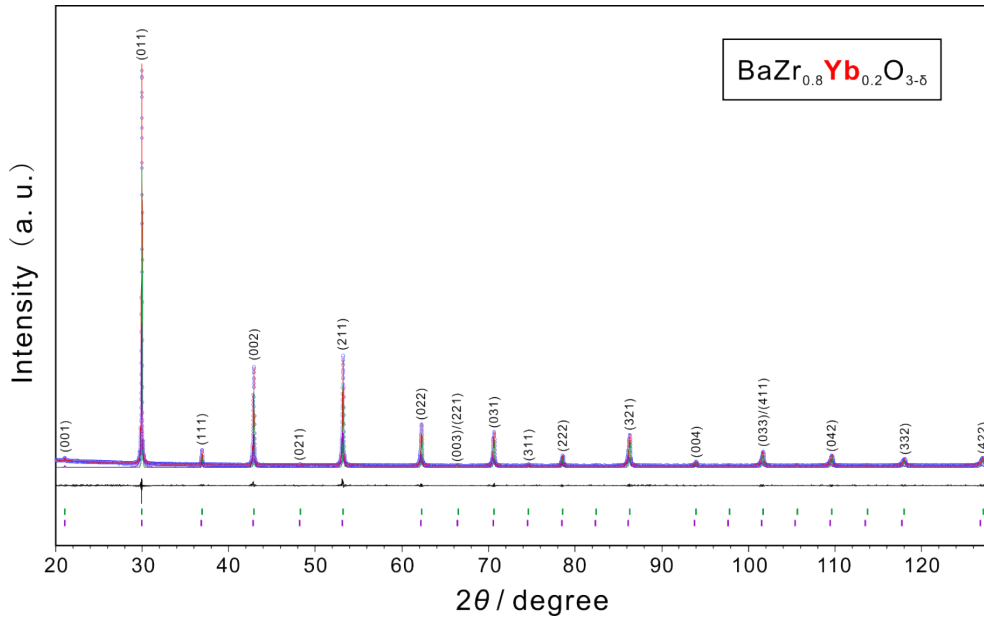

**Fig. S10** Rietveld refinement of the diffraction pattern of  $\text{BaZr}_{0.8}\text{Yb}_{0.2}\text{O}_{3-\delta}$  collected with  $\text{Cu } K\alpha_1$  monochromatic X-ray. The sample was quenched to room temperature after the heat-treatment at 1600 °C. Two cubic perovskite ( $Pm\bar{3}m$ ) structure models for hydrated and dehydrated phases were adopted for the refinement. Observed profile (blue circle), calculated profile (red line), difference (black line at bottom), and Bragg peaks of candidate phases (vertical lines) are shown.

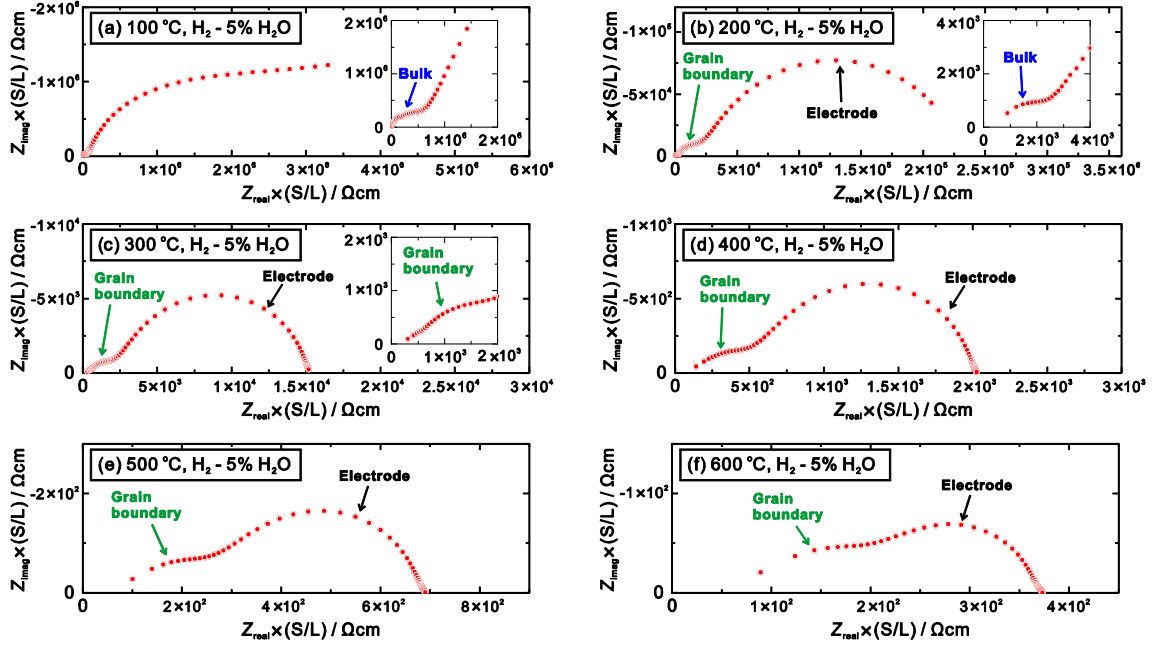

**Fig. S11** AC impedance spectra of  $\text{BaZr}_{0.8}\text{Y}_{0.2}\text{O}_{3-\delta}$  in wet  $\text{H}_2$  ( $p_{\text{H}_2\text{O}} = 0.05 \text{ atm}$ ) at various temperature. Semicircle due to the contribution from bulk conduction can be separated at 100 and 200 °C, but cannot be separated at higher temperature, at which only the contributions from grain boundary conduction and electrode reaction can be identified.

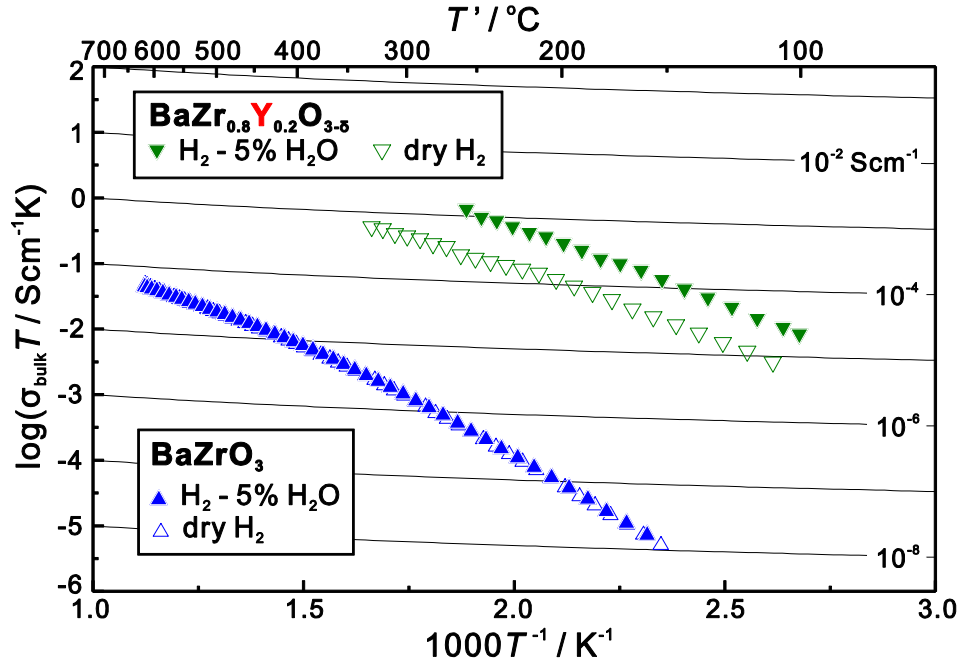

**Fig. S12** Arrhenius plots of bulk conductivity of  $\text{BaZr}_{0.8}\text{Y}_{0.2}\text{O}_{3-\delta}$  and undoped  $\text{BaZrO}_3$  in dry and wet ( $p_{\text{H}_2\text{O}} = 0.05 \text{ atm}$ ) atmospheres of  $\text{H}_2$ .

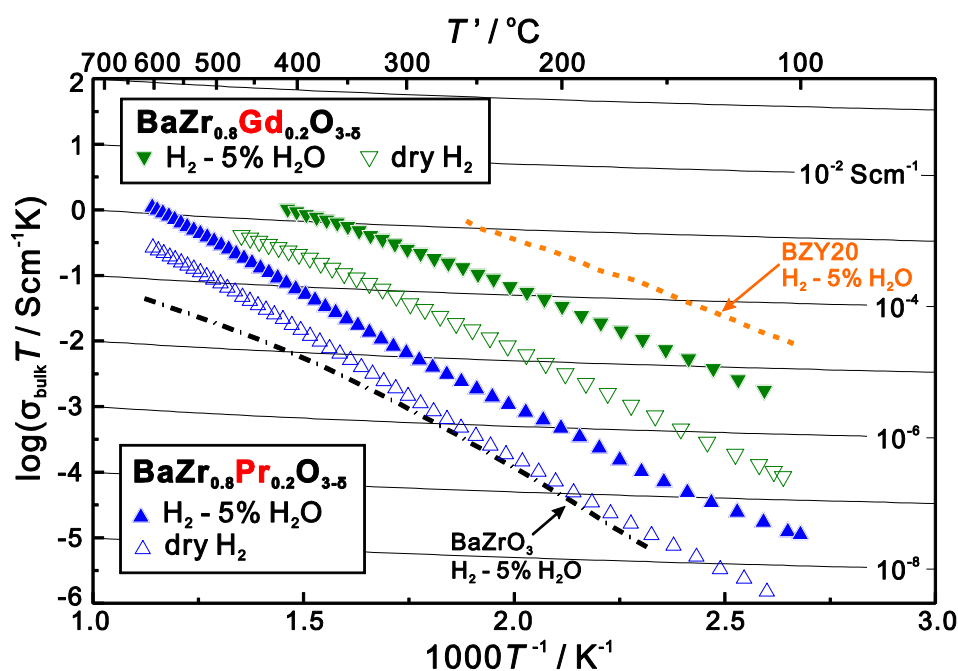

**Fig. S13** Arrhenius plots of bulk conductivity of  $\text{BaZr}_{0.8}\text{Gd}_{0.2}\text{O}_{3-\delta}$  and  $\text{BaZr}_{0.8}\text{Pr}_{0.2}\text{O}_{3-\delta}$  in dry and wet ( $p_{\text{H}_2\text{O}} = 0.05 \text{ atm}$ ) atmospheres of  $\text{H}_2$ . The bulk conductivity of  $\text{BaZr}_{0.8}\text{Y}_{0.2}\text{O}_{3-\delta}$  (BZY20) and undoped  $\text{BaZrO}_3$  in wet  $\text{H}_2$  was given as reference.

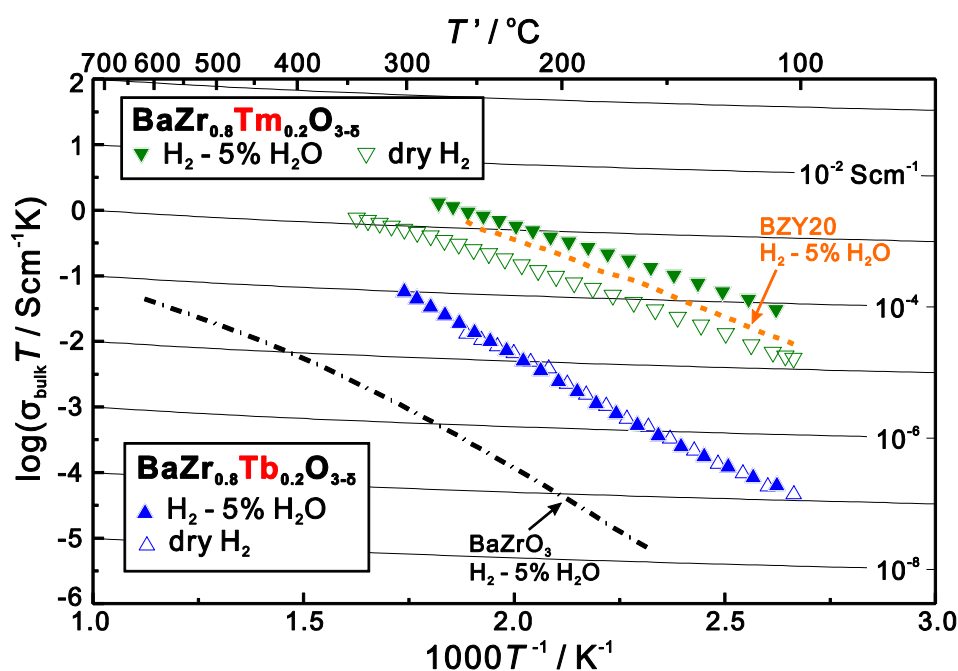

**Fig. S14** Arrhenius plots of bulk conductivity of  $\text{BaZr}_{0.8}\text{Tm}_{0.2}\text{O}_{3-\delta}$  and  $\text{BaZr}_{0.8}\text{Tb}_{0.2}\text{O}_{3-\delta}$  in dry and wet ( $p_{\text{H}_2\text{O}} = 0.05 \text{ atm}$ ) atmospheres of  $\text{H}_2$ . The bulk conductivity of  $\text{BaZr}_{0.8}\text{Y}_{0.2}\text{O}_{3-\delta}$  (BZY20) and undoped  $\text{BaZrO}_3$  in wet  $\text{H}_2$  was given as reference.

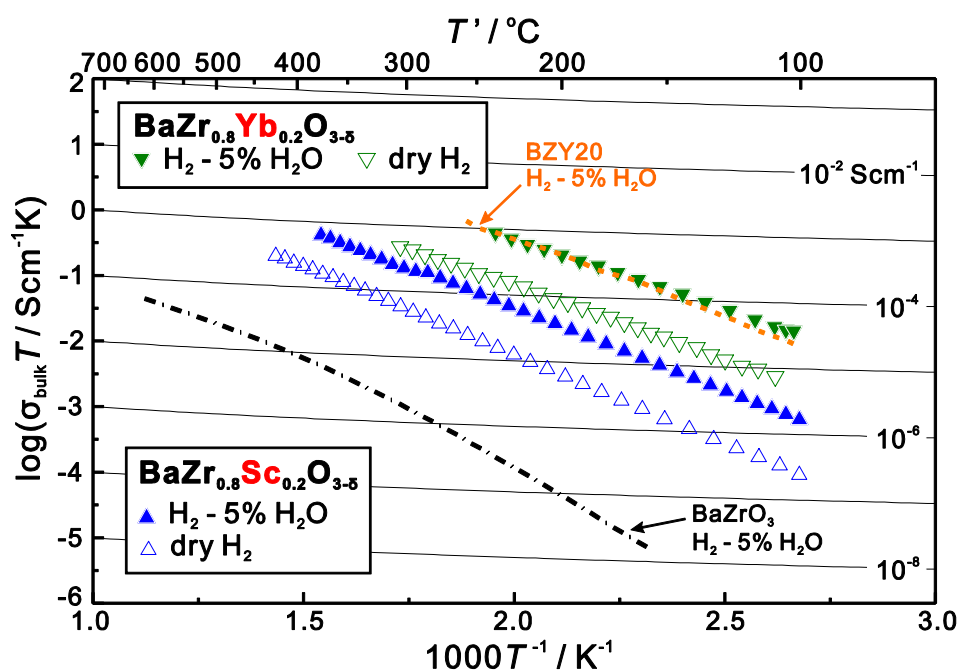

**Fig. S15** Arrhenius plots of bulk conductivity of  $\text{BaZr}_{0.8}\text{Sc}_{0.2}\text{O}_{3-\delta}$  and  $\text{BaZr}_{0.8}\text{Yb}_{0.2}\text{O}_{3-\delta}$  in dry and wet ( $p_{\text{H}_2\text{O}} = 0.05 \text{ atm}$ ) atmospheres of  $\text{H}_2$ . The bulk conductivity of  $\text{BaZr}_{0.8}\text{Y}_{0.2}\text{O}_{3-\delta}$  (BZY20) and undoped  $\text{BaZrO}_3$  in wet  $\text{H}_2$  was given as reference.

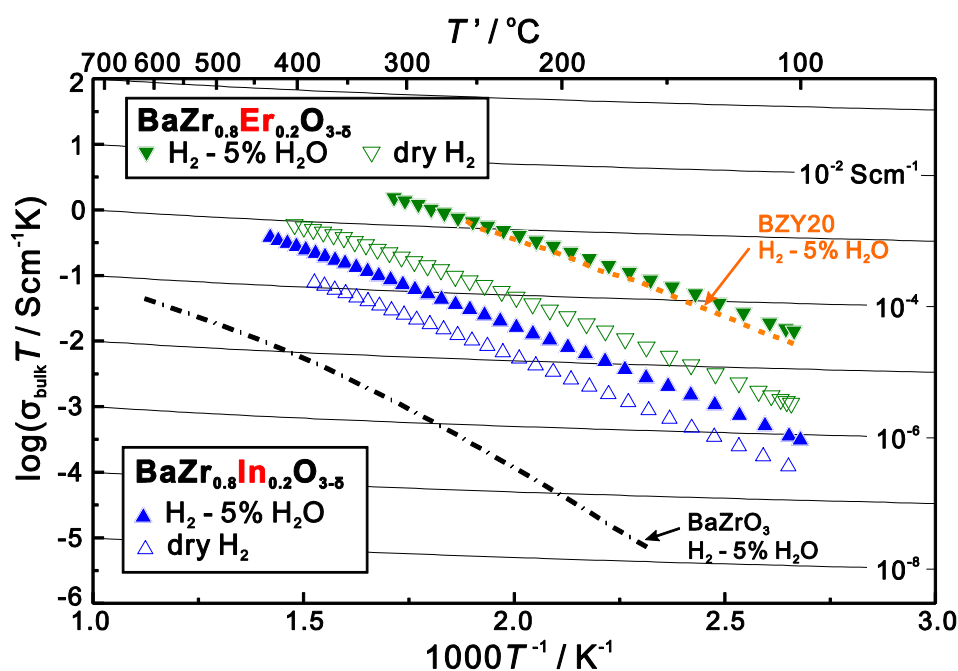

**Fig. S16** Arrhenius plots of bulk conductivity of  $\text{BaZr}_{0.8}\text{In}_{0.2}\text{O}_{3-\delta}$  and  $\text{BaZr}_{0.8}\text{Er}_{0.2}\text{O}_{3-\delta}$  in dry and wet ( $p_{\text{H}_2\text{O}} = 0.05 \text{ atm}$ ) atmospheres of  $\text{H}_2$ . The bulk conductivity of  $\text{BaZr}_{0.8}\text{Y}_{0.2}\text{O}_{3-\delta}$  (BZY20) and undoped  $\text{BaZrO}_3$  in wet  $\text{H}_2$  was given as reference.

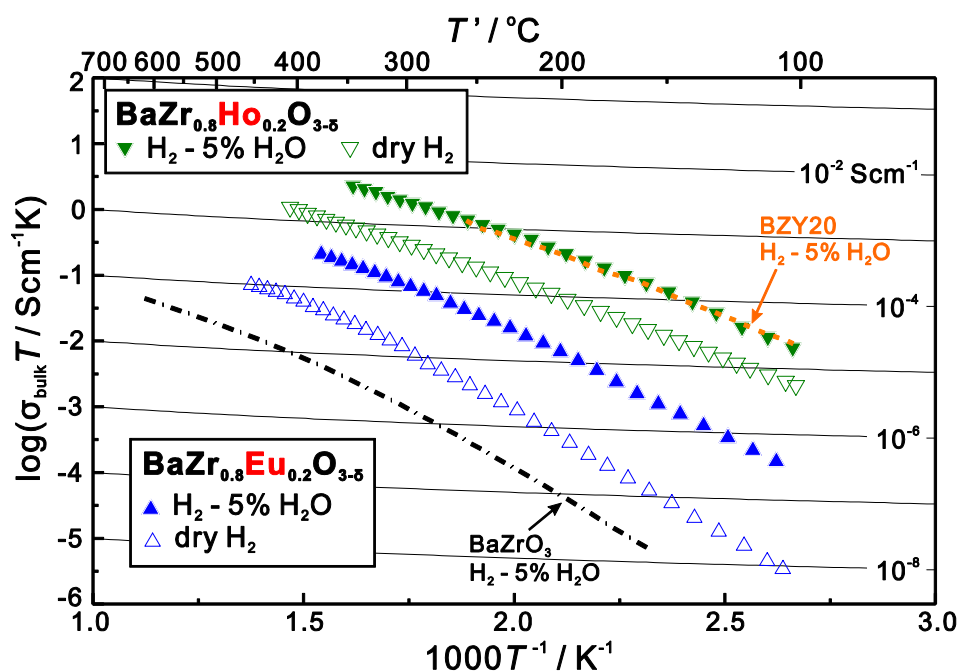

**Fig. S17** Arrhenius plots of bulk conductivity of  $\text{BaZr}_{0.8}\text{Ho}_{0.2}\text{O}_{3-\delta}$  and  $\text{BaZr}_{0.8}\text{Eu}_{0.2}\text{O}_{3-\delta}$  in dry and wet ( $p_{\text{H}_2\text{O}} = 0.05 \text{ atm}$ ) atmospheres of  $\text{H}_2$ . The bulk conductivity of  $\text{BaZr}_{0.8}\text{Y}_{0.2}\text{O}_{3-\delta}$  (BZY20) and undoped  $\text{BaZrO}_3$  in wet  $\text{H}_2$  was given as reference.

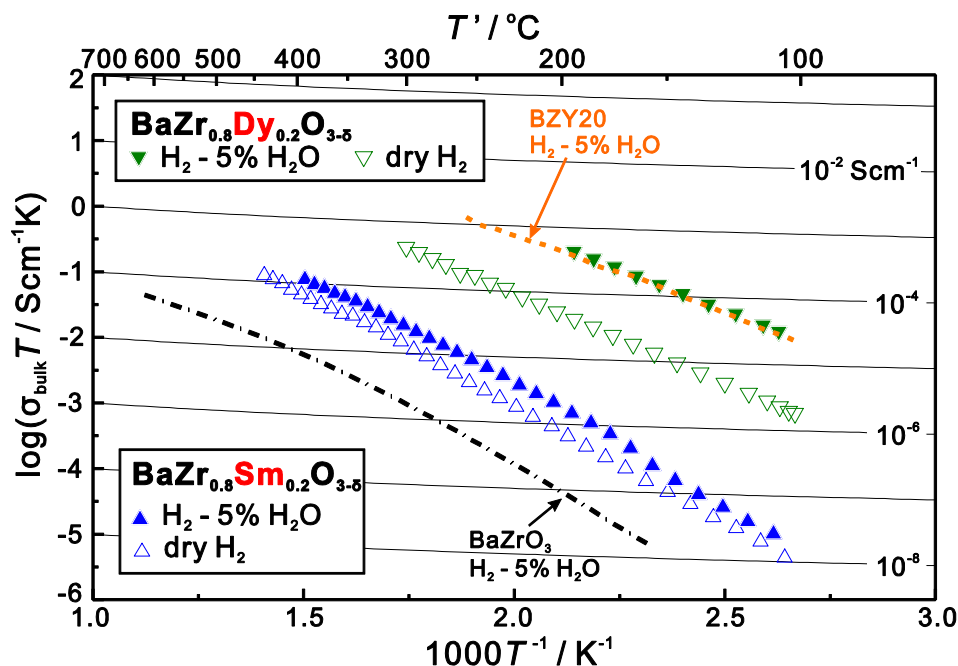

**Fig. S18** Arrhenius plots of bulk conductivity of  $\text{BaZr}_{0.8}\text{Dy}_{0.2}\text{O}_{3-\delta}$  and  $\text{BaZr}_{0.8}\text{Sm}_{0.2}\text{O}_{3-\delta}$  in dry and wet ( $p_{\text{H}_2\text{O}} = 0.05 \text{ atm}$ ) atmospheres of  $\text{H}_2$ . The bulk conductivity of  $\text{BaZr}_{0.8}\text{Y}_{0.2}\text{O}_{3-\delta}$  (BZY20) and undoped  $\text{BaZrO}_3$  in wet  $\text{H}_2$  was given as reference. The conductivities of  $\text{BaZr}_{0.8}\text{Dy}_{0.2}\text{O}_{3-\delta}$  are cited from our previous works (*Solid State Ionics*, 2012, **213**, 2; *Adv. Mater.*, 2012, **24**, 2051.).

**Table S1** Activation energy ( $E_a$ ) and pre-exponential term ( $A$ ) of the bulk conduction in the

samples of undoped BaZrO<sub>3</sub> and those doped with rare earth elements and In in dry and wet atmospheres of H<sub>2</sub>. The partial pressure of water vapor in the wet atmosphere was 0.05 atm.

| Nominal<br>composition                                                   | Dry H <sub>2</sub> |                           | H <sub>2</sub> – 5% H <sub>2</sub> O |                           |
|--------------------------------------------------------------------------|--------------------|---------------------------|--------------------------------------|---------------------------|
|                                                                          | $E_a$ / eV         | $A$ / Scm <sup>-1</sup> K | $E_a$ / eV                           | $A$ / Scm <sup>-1</sup> K |
| BaZrO <sub>3</sub>                                                       | 0.781(3)           | $4.21(33) \times 10^3$    | 0.760(3)                             | $3.30(26) \times 10^3$    |
| BaZr <sub>0.8</sub> Sc <sub>0.2</sub> O <sub>3-<math>\delta</math></sub> | 0.541(1)           | $2.03(6) \times 10^3$     | 0.506(1)                             | $3.49(7) \times 10^3$     |
| BaZr <sub>0.8</sub> Y <sub>0.2</sub> O <sub>3-<math>\delta</math></sub>  | 0.446(5)           | $2.35(29) \times 10^3$    | 0.453(6)                             | $1.52(22) \times 10^4$    |
| BaZr <sub>0.8</sub> In <sub>0.2</sub> O <sub>3-<math>\delta</math></sub> | 0.510(2)           | $6.19(2) \times 10^2$     | 0.497(3)                             | $1.36(11) \times 10^3$    |
| BaZr <sub>0.8</sub> Pr <sub>0.2</sub> O <sub>3-<math>\delta</math></sub> | 0.696(6)           | $1.74(24) \times 10^3$    | 0.598(7)                             | $1.07(18) \times 10^3$    |
| BaZr <sub>0.8</sub> Sm <sub>0.2</sub> O <sub>3-<math>\delta</math></sub> | 0.708(2)           | $1.22(7) \times 10^4$     | 0.738(9)                             | $5.53(12) \times 10^4$    |
| BaZr <sub>0.8</sub> Eu <sub>0.2</sub> O <sub>3-<math>\delta</math></sub> | 0.744(4)           | $2.71(26) \times 10^4$    | 0.623(5)                             | $2.61(35) \times 10^4$    |
| BaZr <sub>0.8</sub> Gd <sub>0.2</sub> O <sub>3-<math>\delta</math></sub> | 0.599(2)           | $7.92(41) \times 10^3$    | 0.512(3)                             | $9.07(74) \times 10^3$    |
| BaZr <sub>0.8</sub> Tb <sub>0.2</sub> O <sub>3-<math>\delta</math></sub> | 0.656(9)           | $2.50(59) \times 10^4$    | 0.679(10)                            | $4.52(113) \times 10^4$   |
| BaZr <sub>0.8</sub> Dy <sub>0.2</sub> O <sub>3-<math>\delta</math></sub> | 0.544(2)           | $1.41(6) \times 10^4$     | 0.497(2)                             | $4.76(29) \times 10^4$    |
| BaZr <sub>0.8</sub> Ho <sub>0.2</sub> O <sub>3-<math>\delta</math></sub> | 0.466(2)           | $4.09(20) \times 10^3$    | 0.480(6)                             | $2.88(44) \times 10^4$    |
| BaZr <sub>0.8</sub> Er <sub>0.2</sub> O <sub>3-<math>\delta</math></sub> | 0.484(2)           | $3.52(18) \times 10^3$    | 0.429(4)                             | $8.74(81) \times 10^3$    |
| BaZr <sub>0.8</sub> Tm <sub>0.2</sub> O <sub>3-<math>\delta</math></sub> | 0.431(3)           | $3.51(24) \times 10^3$    | 0.400(3)                             | $6.32(45) \times 10^3$    |
| BaZr <sub>0.8</sub> Yb <sub>0.2</sub> O <sub>3-<math>\delta</math></sub> | 0.444(2)           | $2.13(11) \times 10^3$    | 0.422(2)                             | $6.45(40) \times 10^3$    |
